# Supplementary material for: Description of Chloramphenicol Resistant Kineococcus rubinsiae sp. nov. Isolated From a Spacecraft Assembly Facility
Source: PubMed Central journal article supplement (PMC7472656; doi:10.3389/fmicb.2020.01957), 2020-08-18
Supplement: Image_1.pdf [file Image_1.pdf]

# Quinone Determination

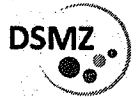

Data file: DSM 11050620200218 112116Chinone\_spektra\_2mm\_HPLC2.amx.dx  
Sequence Name: 200218\_afr Processing method: 190304\_Chinone\_Standards7.pmx  
Sample name: DSM 110506 Manually modified: Manual Integration  
Instrument: HPLC2 Injection date: 2020-02-18 11:22:11+01:00  
Inj. volume: 5.0 Location: P1-A3  
Acq. method: Chinone\_spektra\_2mm\_HPLC2.amx

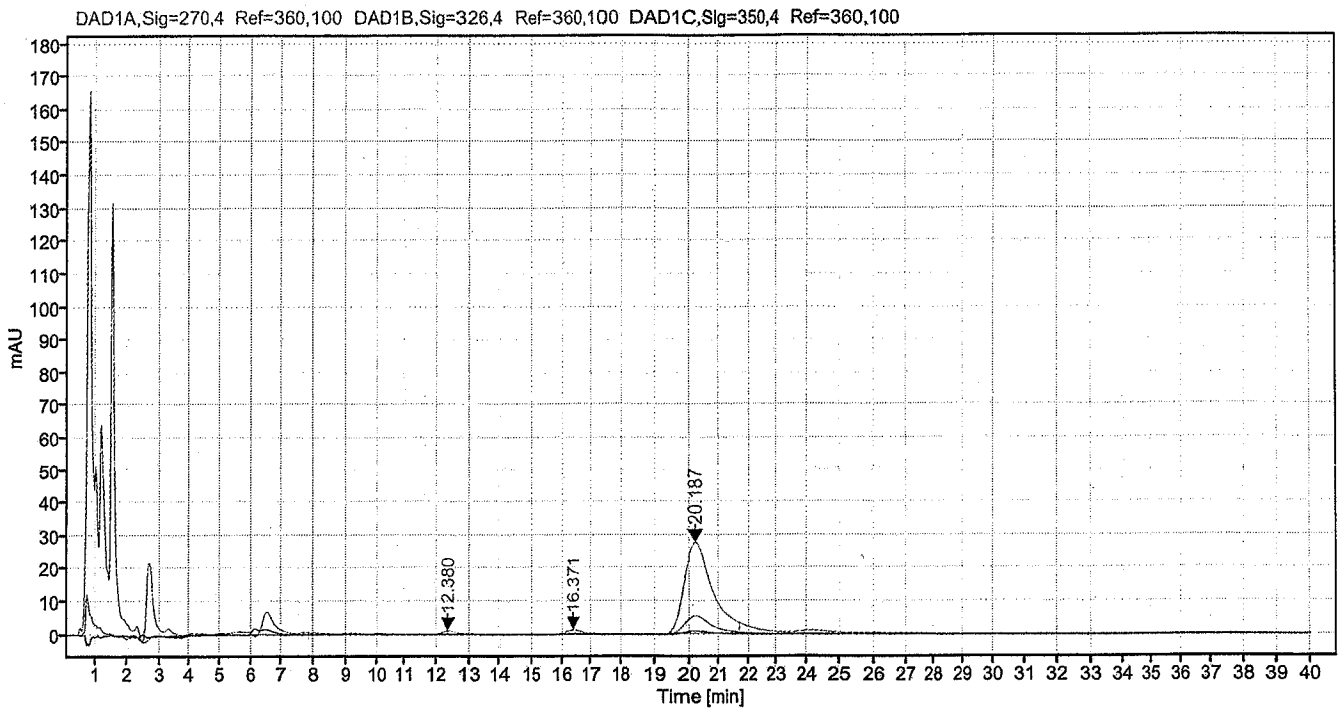

Signal: DAD1A, Sig=270,4 Ref=360,100

| RT [min] | Type | Width [min] | Area    | Height | Area% | Name    |
|----------|------|-------------|---------|--------|-------|---------|
| 12.380   | MM m | 0.44        | 30.37   | 1.05   | 1.74  | MK 8 H2 |
| 16.371   | MM m | 0.54        | 45.58   | 1.22   | 2.61  | MK 9    |
| 20.187   | MM m | 0.89        | 1673.50 | 27.69  | 95.66 | MK 9 H2 |
|          |      | Sum         | 1749.45 |        |       |         |
