# Supplementary material for: Description of Chloramphenicol Resistant Kineococcus rubinsiae sp. nov. Isolated From a Spacecraft Assembly Facility
Source: PubMed Central journal article supplement (PMC7472656; doi:10.3389/fmicb.2020.01957), 2020-08-18
Supplement: Image_2.pdf [file Image_2.pdf]

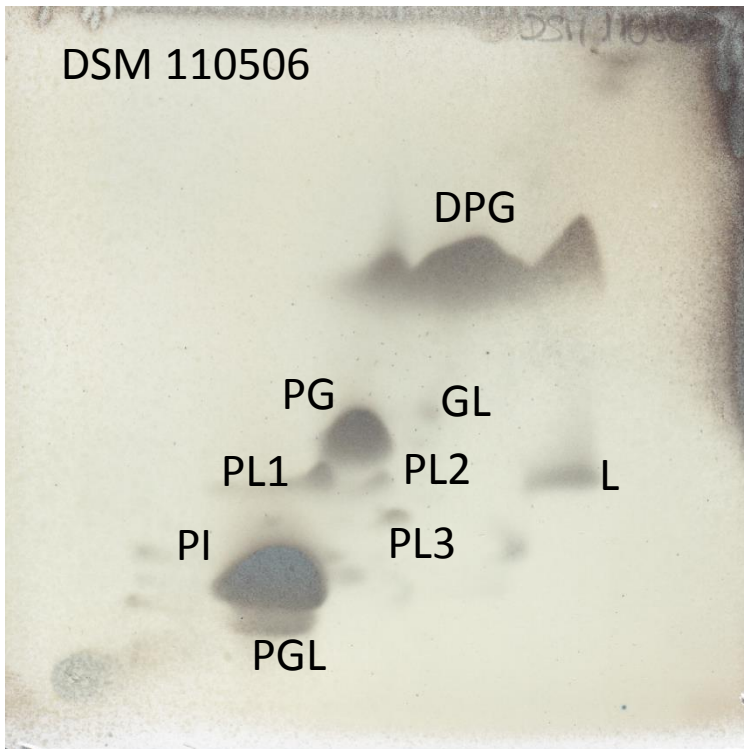

PG = phosphatidylglycerol

DPG = diphosphatidylglycerol

PI = phosphatidylinositol

PL1 – PL3 = phospholipids

L = lipid

GL = glycolipid

PGL = phosphoglycolipid with a Rf value consistent with this being a monoacylated dimannosylphosphatidylinositol
